# Supplementary material for: Impact of particle surface chemistry on the structure and rheological properties of graphene-based particle/polydimethylsiloxane composites
Source: Royal Society of Chemistry journal article supplement (doi:10.1039/c5ra04364f), 2015-01-01
Supplement: c5ra04364f1.pdf [file c5ra04364f1.pdf]

Electronic Supplementary Information for

**Impact of particle surface chemistry on the structure and  
rheological properties of graphene-based particle  
/polydimethylsiloxane composites**

Ran Niu,<sup>a,b</sup> Jiang Gong,<sup>a,b</sup> Donghua Xu,<sup>a,\*</sup> Tao Tang<sup>a</sup> and Zhao-Yan Sun<sup>a,\*</sup>

<sup>a</sup> State Key Laboratory of Polymer Physics and Chemistry, Changchun Institute of Applied Chemistry, Chinese Academy of Sciences, Changchun 130022, P. R. China

<sup>b</sup> University of Chinese Academy of Sciences, Beijing 100039, P. R. China

\*To whom correspondence should be addressed.

Tel.: +86 (0) 431 85262896.

Fax: +86 (0) 431 85262969.

E-mail: dhxu@ciac.ac.cn and zysun@ciac.ac.cn

|                                                                                                                                         |    |
|-----------------------------------------------------------------------------------------------------------------------------------------|----|
| Fig. S1: Viscosity and normal stress of 9.1 wt % GP-4/P28 measured by different geometries .....                                        | 3  |
| Fig. S2: TEM images of 3.7 wt % graphene-based particle/P28 composites .....                                                            | 3  |
| Fig. S3: WAXD patterns of graphene-based particle/P117 composites .....                                                                 | 4  |
| Fig. S4: SAXS profiles of graphene-based particle/P117 composites .....                                                                 | 4  |
| Fig. S5: High resolution optical micrographs of 1.0 wt % graphene-based particle/P28 composites .....                                   | 5  |
| Fig. S6: POM images of graphene-based particle/P117 composites .....                                                                    | 5  |
| Fig. S7: Frequency sweep results of graphene-based particle/P28 composites .....                                                        | 6  |
| Fig. S8: Linear fitting of plateau modulus versus reduced mass fraction for graphene-based particle/P28 composites .....                | 7  |
| Fig. S9: Storage and loss moduli for 9.1 wt % graphene-based particle/P28 composites .....                                              | 7  |
| Fig. S10: Detailed micrographs of vorticity aligned structure of composites .....                                                       | 8  |
| Fig. S11: Structures of 2.0 wt % samples under high shear rates .....                                                                   | 8  |
| Fig. S12: Structure of 2.0 wt % graphene-based particle/P117 composites under weak shear .....                                          | 9  |
| Fig. S13: Viscosity of 9.1 wt % graphene-based particle/P28 composites .....                                                            | 9  |
| Fig. S14: Normal stress differences of 9.1 wt % graphene-based particle/P28 composites .....                                            | 9  |
| Fig. S15: Normal stress differences of 3.8 wt % GP-1/P28 and 3.8 wt % GP-4/P28 composites .....                                         | 10 |
| Fig. S16: Normal stress differences of 10.7 wt % graphene-based particle/P117 composites .....                                          | 10 |
| Fig. S17: Aggregate size distribution and Gaussian fitting of aggregate size histogram of graphene-based particle/P28 suspensions ..... | 11 |

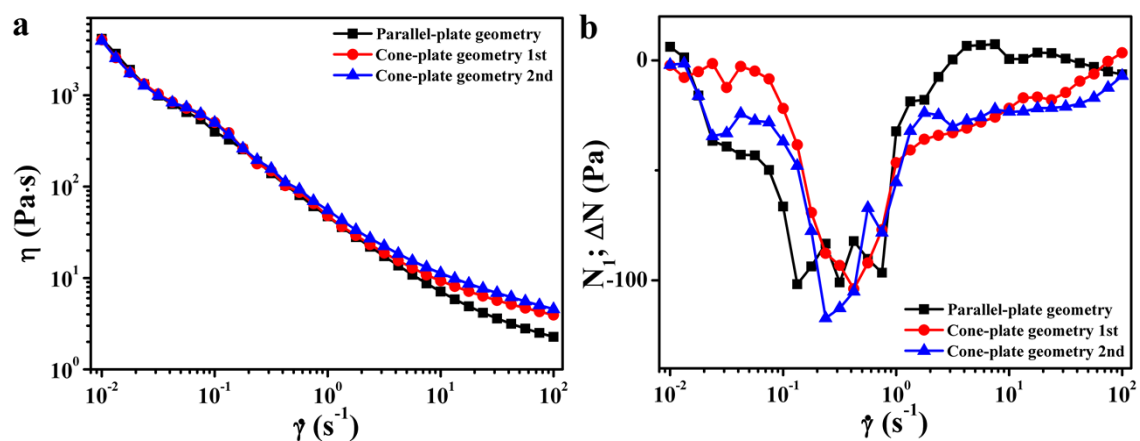

**Fig. S1.** Viscosity and normal stress differences of 9.1 wt % GP-4/P28 suspension measured by parallel-plate and cone-plate geometries.

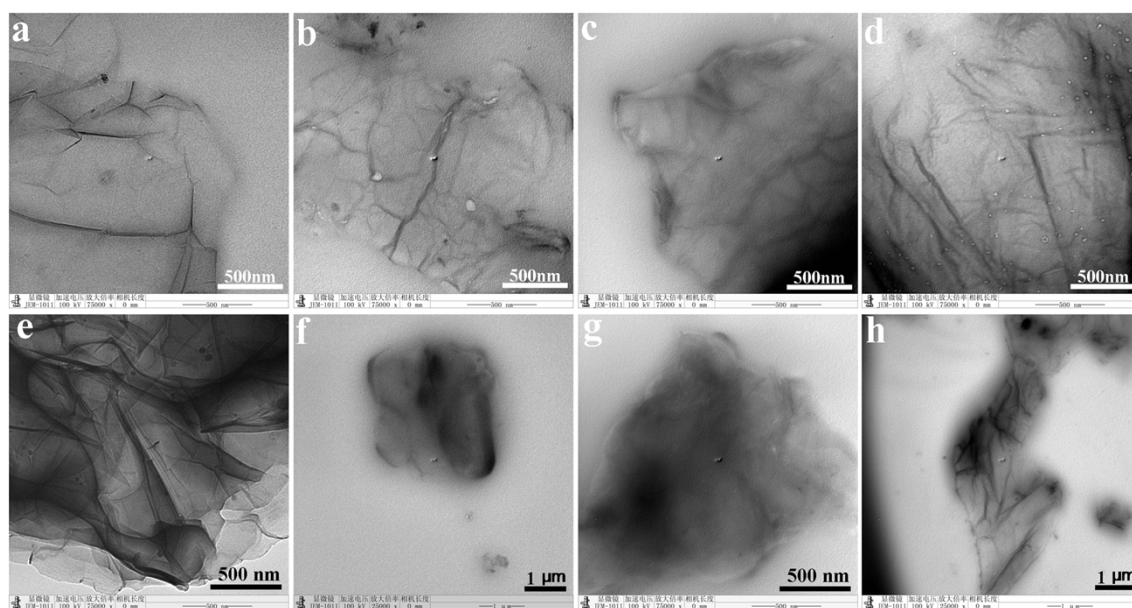

**Fig. S2.** TEM images of GP-1/P28 (a and e), GP-2/P28 (b and f), GP-3/P28 (c and g) and GP-4/P28 composites (d and h) with 3.7 wt % graphene-based particles.

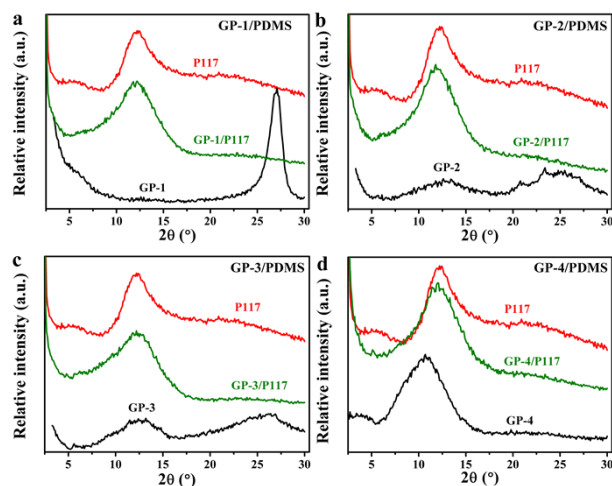

**Fig. S3.** WAXD patterns of GP-1/P117 (a), GP-2/P117 (b) GP-3/P117 (c) and GP-4/P117 composites (d) with 7.4 wt % graphene-based particles. The curves are vertically shifted for clarity.

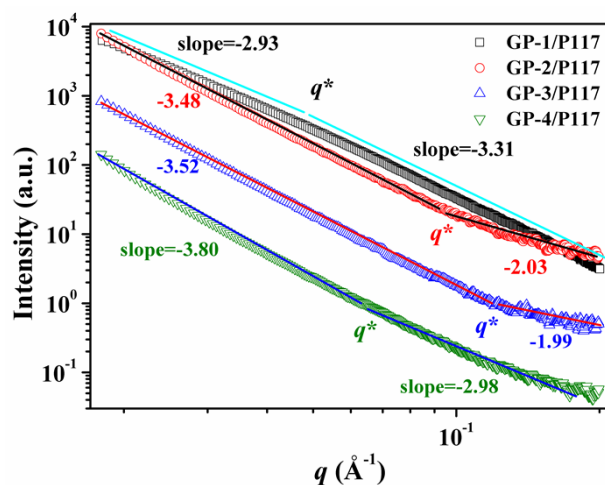

**Fig. S4.** SAXS profiles of 7.4 wt % graphene-based particle/P117 composites.

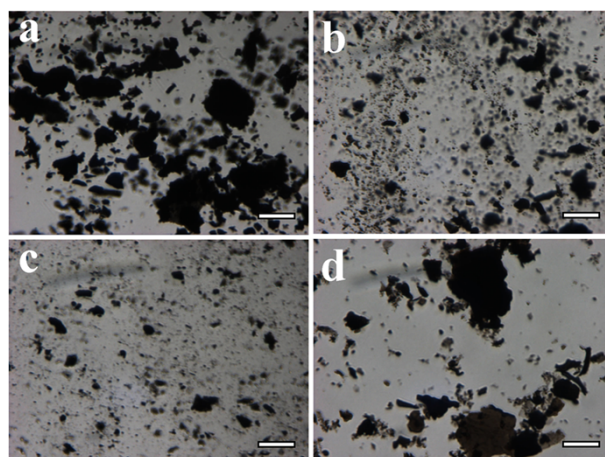

**Fig. S5.** High resolution optical micrographs of 1.0 wt % graphene-based particle/P28 composites. The scale bars are 30  $\mu\text{m}$ .

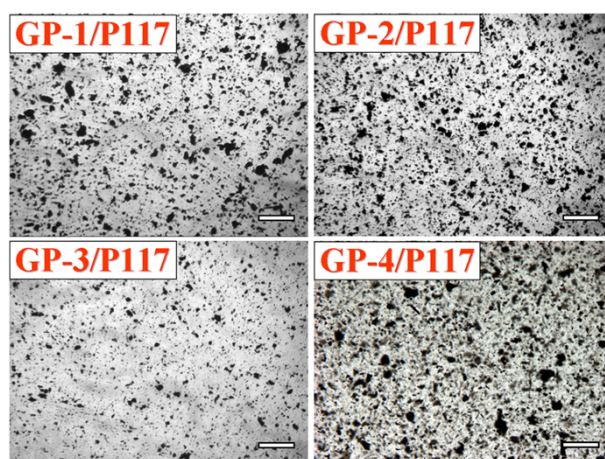

**Fig. S6.** Optical micrographs of 1.0 wt % graphene-based particle/P117 composites. The scale bars are 150  $\mu\text{m}$ .

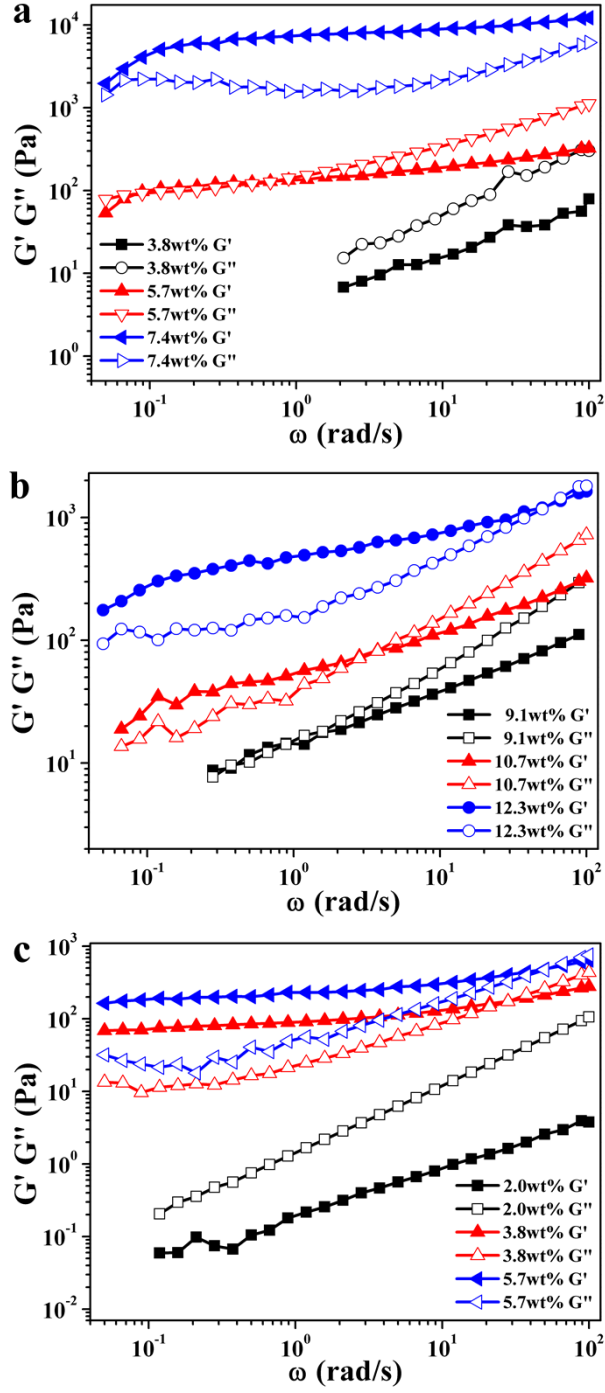

**Fig. S7.** Frequency sweep results of GP-1/P28 (a), GP-3/P28 (b) and GP-4/P28 composites (c).

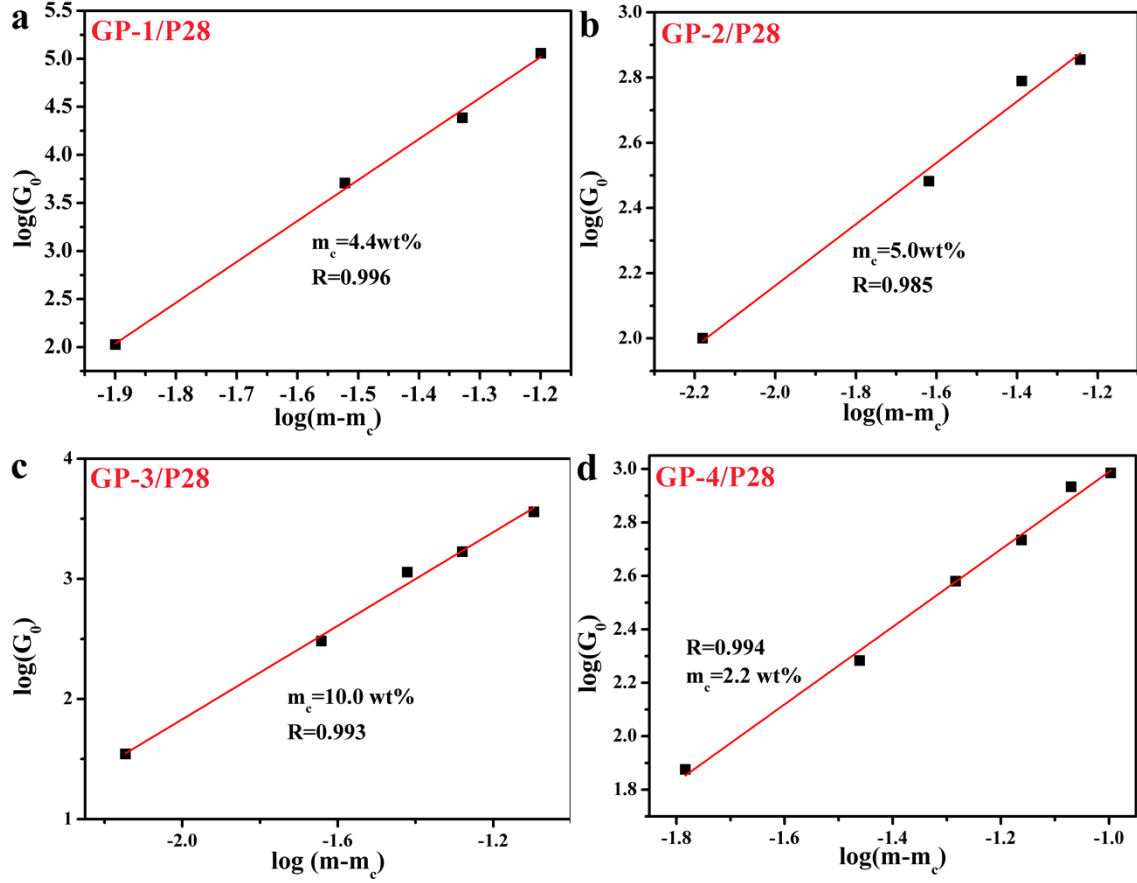

**Fig. S8.** Log-log plot of plateau modulus versus reduced mass fraction of graphene-based particle/P28 composites.

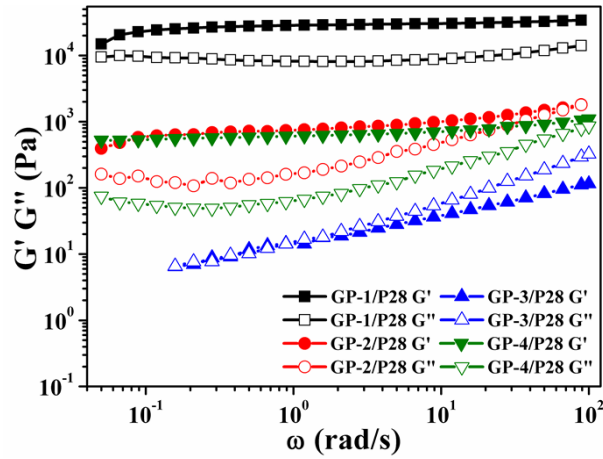

**Fig. S9.** Storage ( $G'$ ) and loss moduli ( $G''$ ) versus frequency ( $\omega$ ) for 9.1 wt % graphene-based particle/P28 composites.



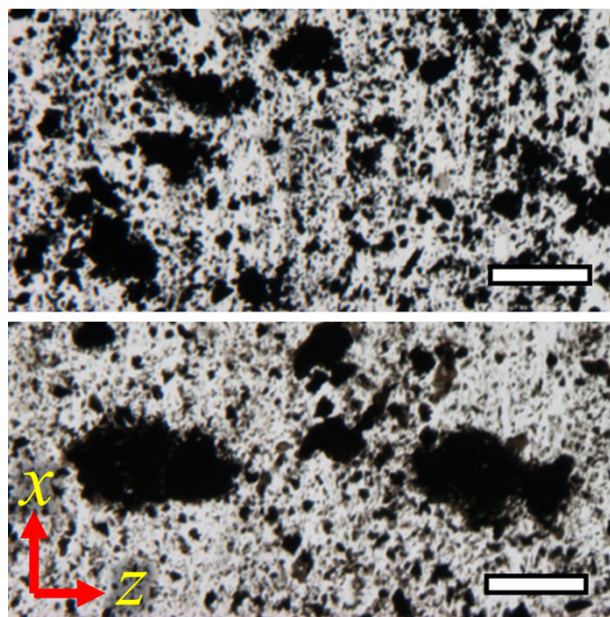

**Fig. S10.** Detailed micrographs of the vorticity aligned structure of graphene-based particle suspensions. The scale bars are 75  $\mu\text{m}$ .

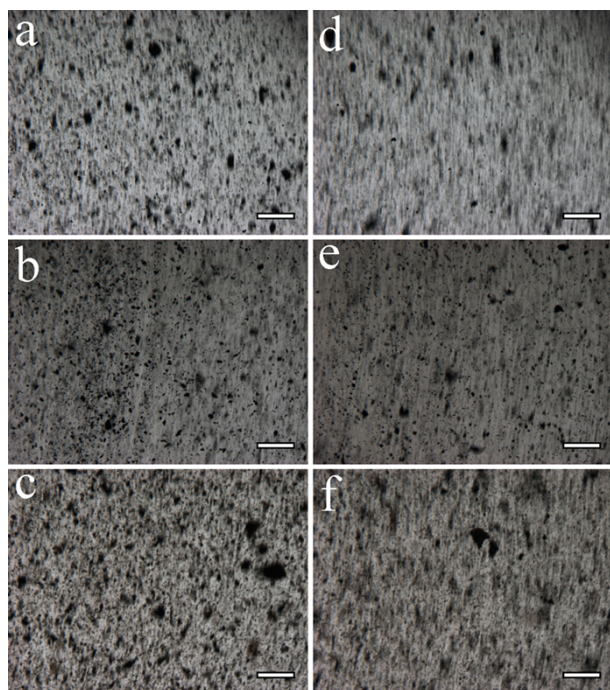

**Fig. S11.** Structures of 2 wt % GP-2/P28 (a and d), 2 wt % GP-3/P28 (b and e) and 2 wt % GP-4/P28 composites (c and f) under a shear rate of 0.5  $\text{s}^{-1}$  (a, b and c) and 1  $\text{s}^{-1}$  (d, e and f). The gap is 150  $\mu\text{m}$  and the scale bars are 150  $\mu\text{m}$ . Photos are taken after shearing for about 40 s.



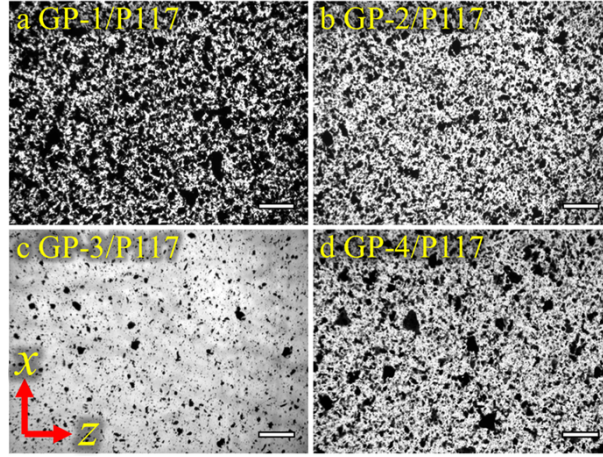

**Fig. S12.** Structures of 2.0 wt % graphene-based particle/P117 composites at a shear rate of  $0.05 \text{ s}^{-1}$ . The gap is  $150 \text{ }\mu\text{m}$  and the scale bars are  $150 \text{ }\mu\text{m}$ . Photos are taken after shearing for about 40 s.

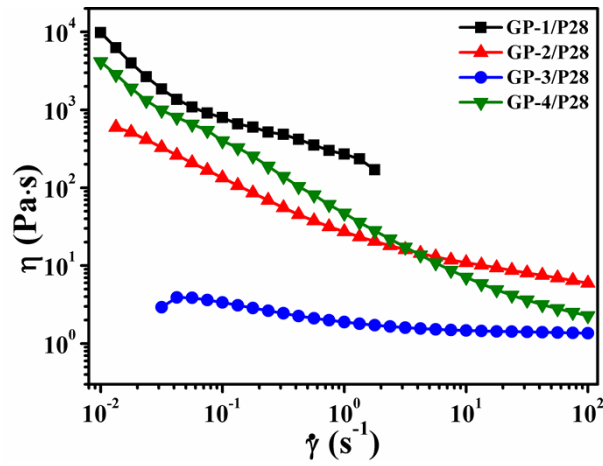

**Fig. S13.** Viscosity ( $\eta$ ) versus shear rate ( $\dot{\gamma}$ ) for 9.1 wt % graphene-based particle/P28 composites.

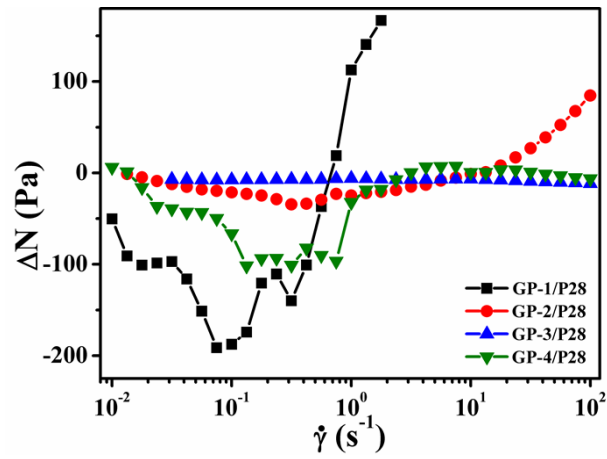

**Fig. S14.** Normal stress differences ( $\Delta N$ ) versus shear rate for 9.1 wt % graphene-based particle/P28 composites.

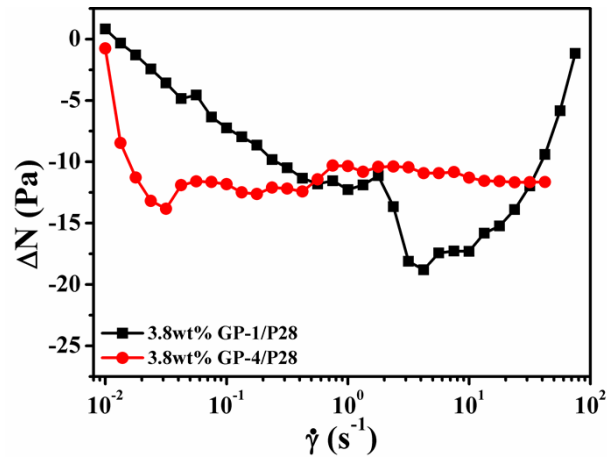

**Fig. S15.** Normal stress differences ( $\Delta N$ ) versus shear rate for 3.8 wt % GP-1/P28 and 3.8 wt % GP-4/P28 composites.

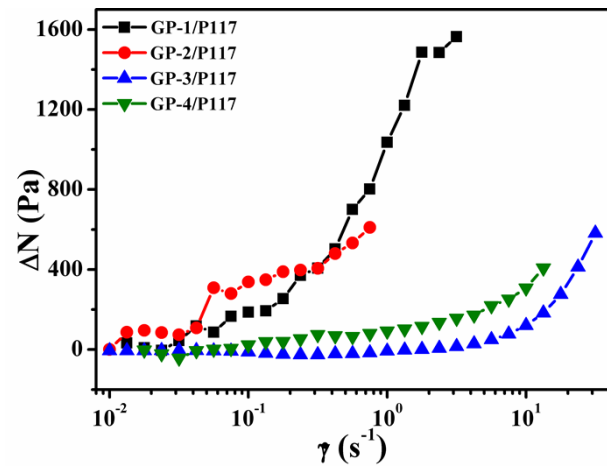

**Fig. S16.** Normal stress differences ( $\Delta N$ ) versus shear rate for 10.7 wt % graphene-based particle/P117 composites.

based particle/P117 composites.

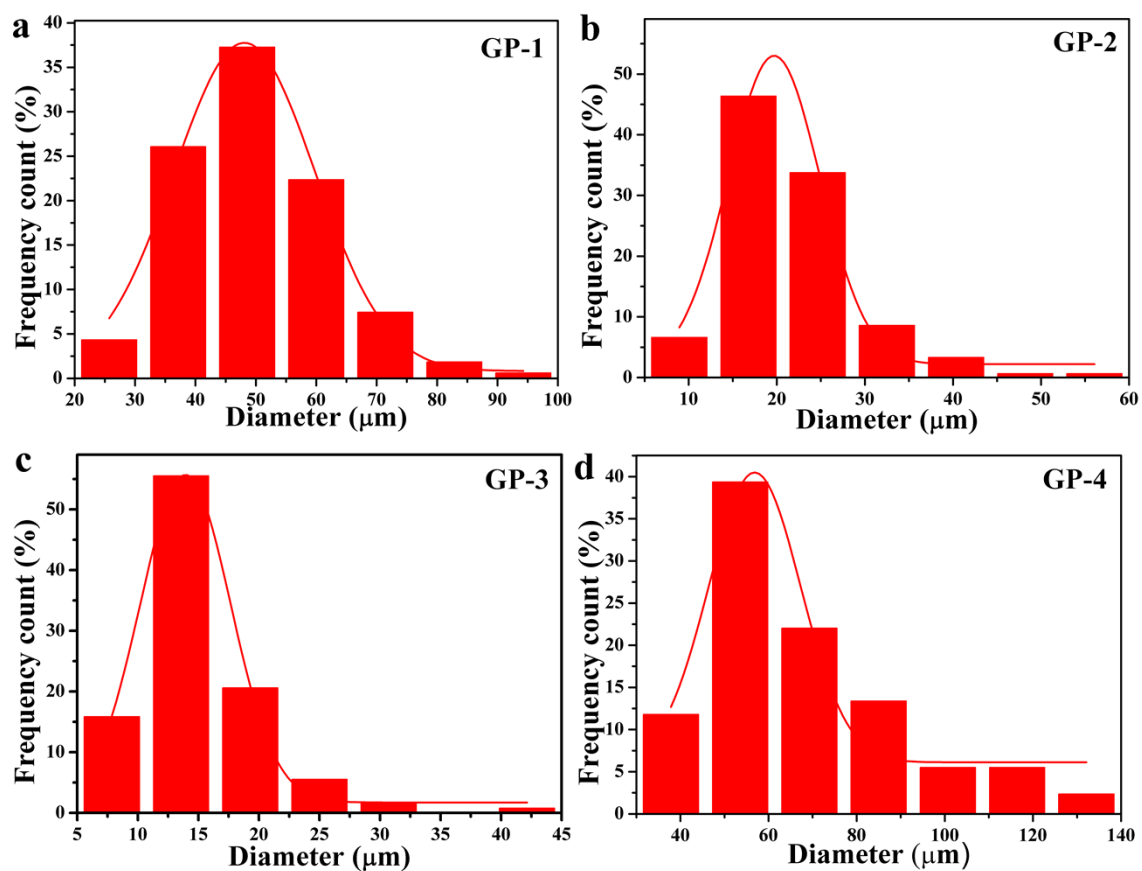

**Fig. S17.** Diameter distribution and Gaussian fitting of the size of GP-1 (a), GP-2 (b), GP-3 (c) and GP-4 aggregates (d).
